# Supplementary material
Source: publisher figshare collection journal article supplement (https://frontiersin.figshare.com/ndownloader/files/23659238)
Supplement: Supplementary file [file 23659238]

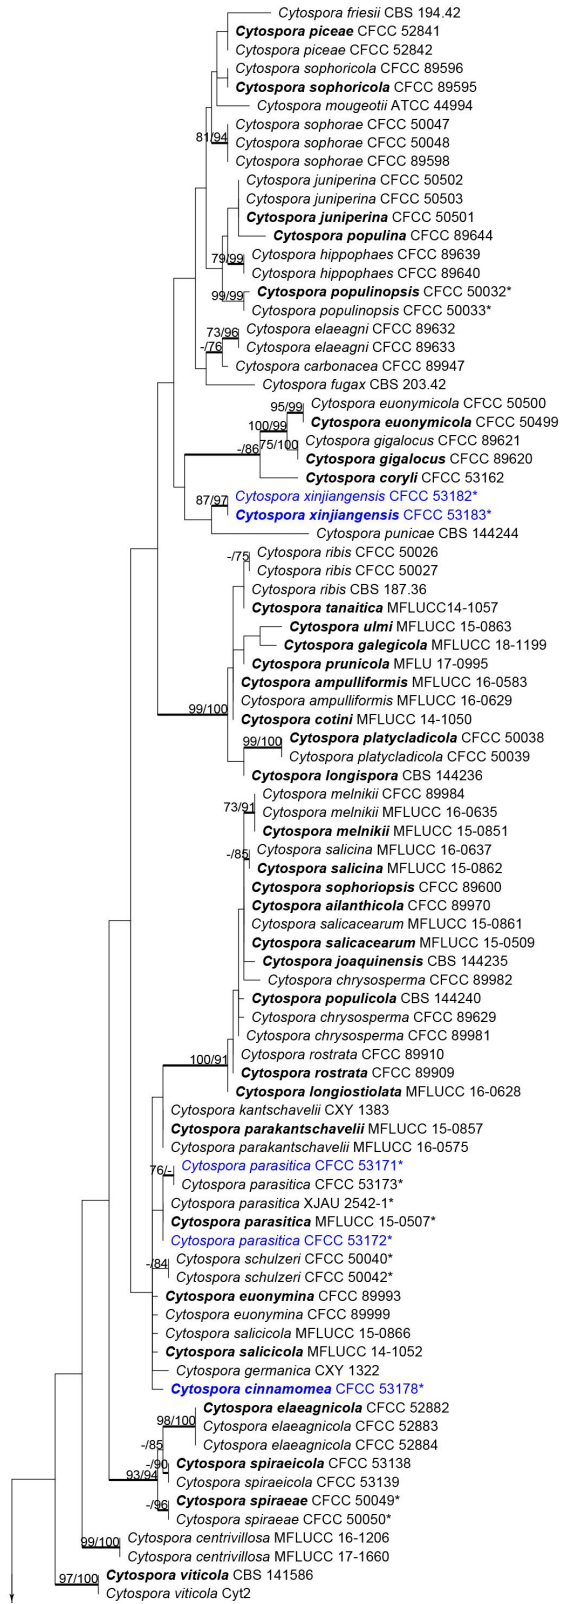

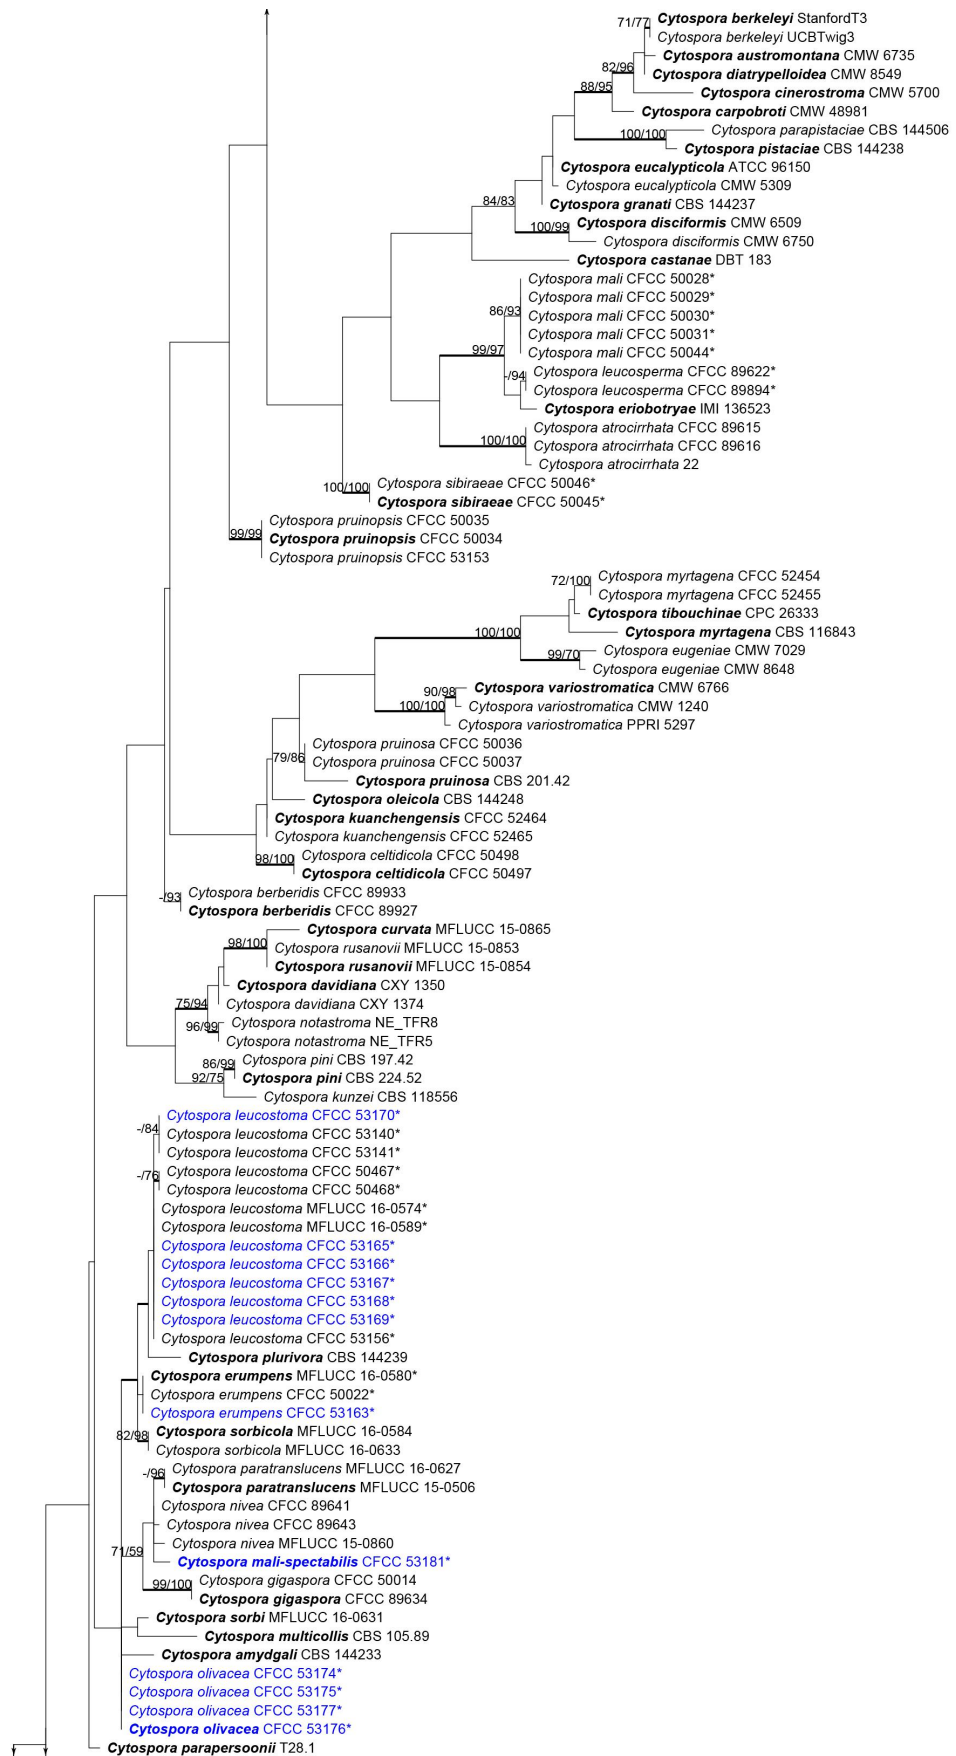

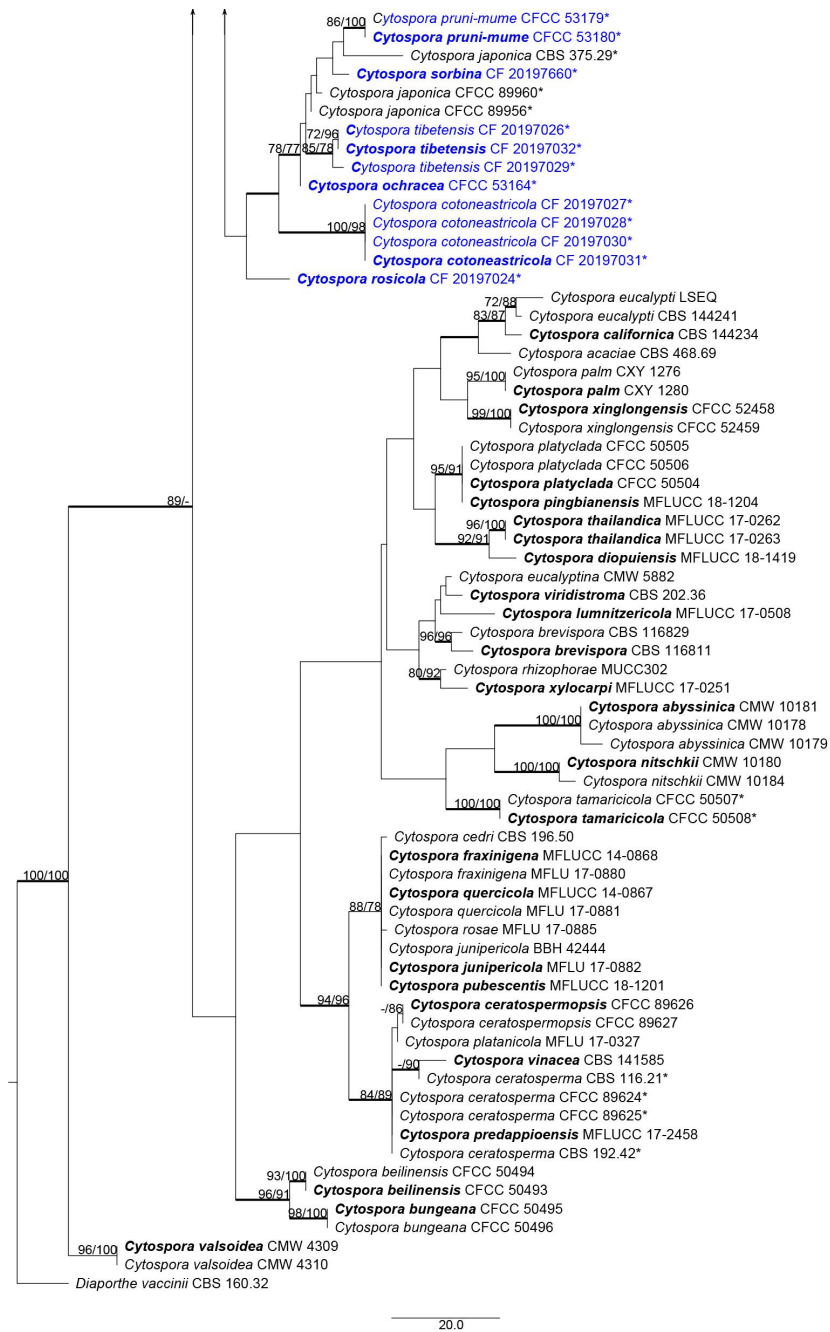

**Figure S1.** Phylogram of *Cytospora* based on ITS gene. MP and ML bootstrap support values above 70 % are shown at the first and second position. Thickened branches represent posterior probabilities above 0.95 from BI. Ex-type strains are in bold. Strains in current study are in blue. All the *Cytospora* species listed from Rosaceae plants in China are marked with \*.
